# Supplementary material for: Identification of a Novel Biosurfactant with Antimicrobial Activity Produced by Rhodococcus opacus R7
Source: MDPI journal article supplement (doi:10.3390/microorganisms10020475), 2022-02-21
Supplement: s1 [file s1]

**Table S1.** NMR spectra of the biosurfactant compound from *R. opacus* R7 revealing the amino acids composition.

| Amino acid | <sup>1</sup> H | <sup>13</sup> C   |
|------------|----------------|-------------------|
| Ala        | 1.35/3.75      | 19.88/48.45       |
| Asp        | 2.9/3.05/3.65  | 37.05/42.64/53.72 |
| Gly        | 3.35           | 40.77             |
| Ser        | 3.6/3.7        | 37.05/42.64       |
| Thr        | 1.2/3.4/3.6    | 34.13/49.96/53.72 |

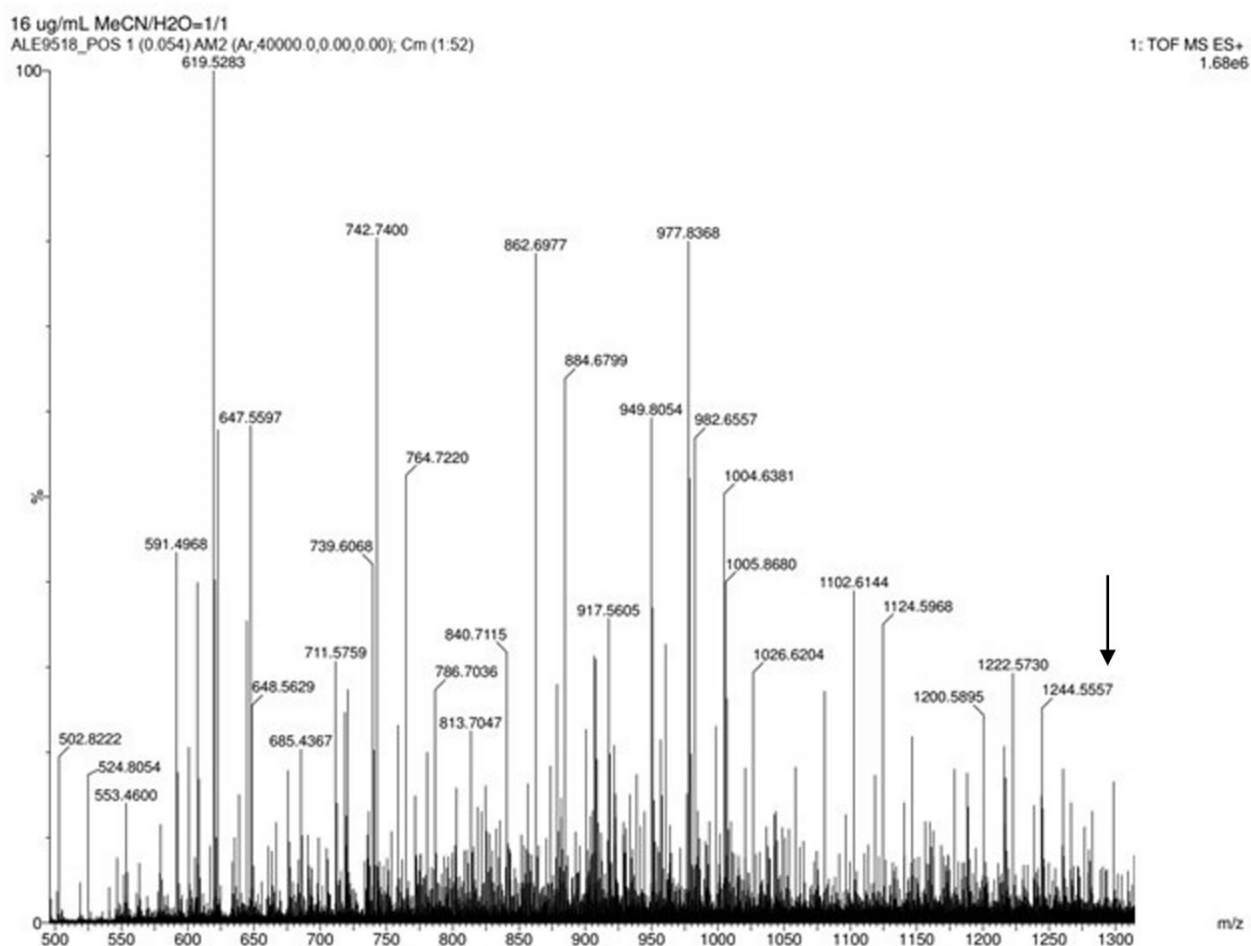

**Figure S1.** ESI-full mass analysis of the isolated compound. The arrow indicates the mass of 1292 Da.
